# Supplementary material for: Forest Stages’s Phenology Across China's Thermal Zones: Implications For Carbon-Water Sustainability
Source: Research Square preprint supplement (doi:10.21203/rs.3.rs-6636199/v1), 2025-05-22
Supplement: Supplementary file 1 [file 66551967004aadd6b297140f.docx]

**Supplementary Fig 1. SHAP Feature Importance Ranking Plot in CTZ**


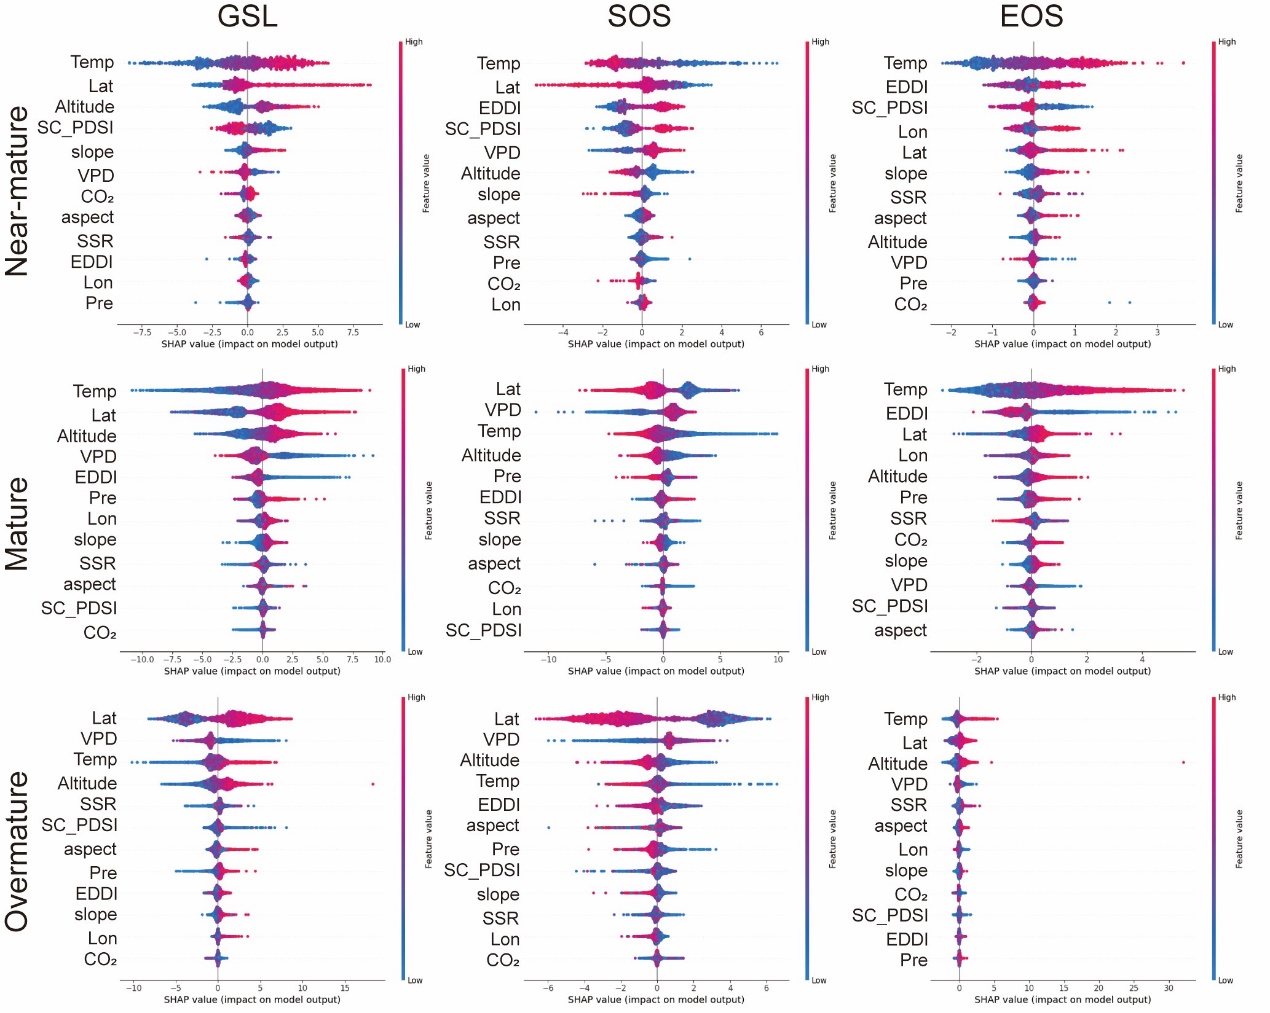


**Supplementary Fig 2. SHAP Feature Importance Ranking Plot in PZ**


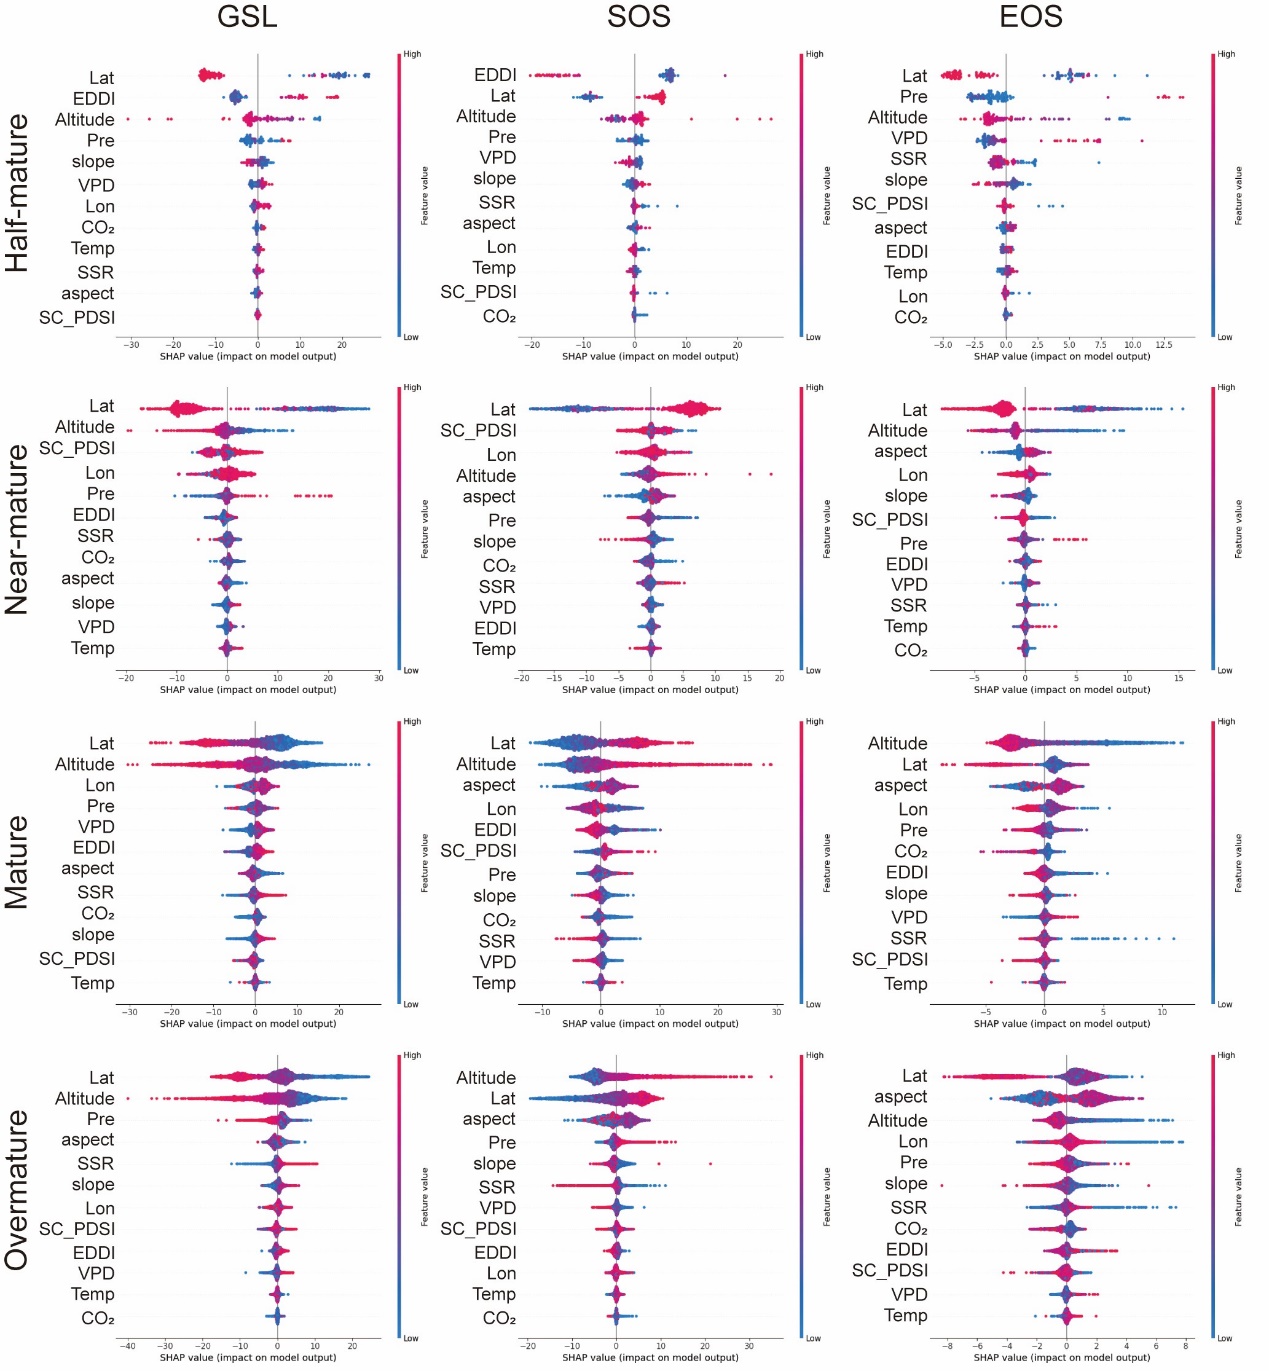


**Supplementary Fig 3. SHAP Feature Importance Ranking Plot in MTZ**


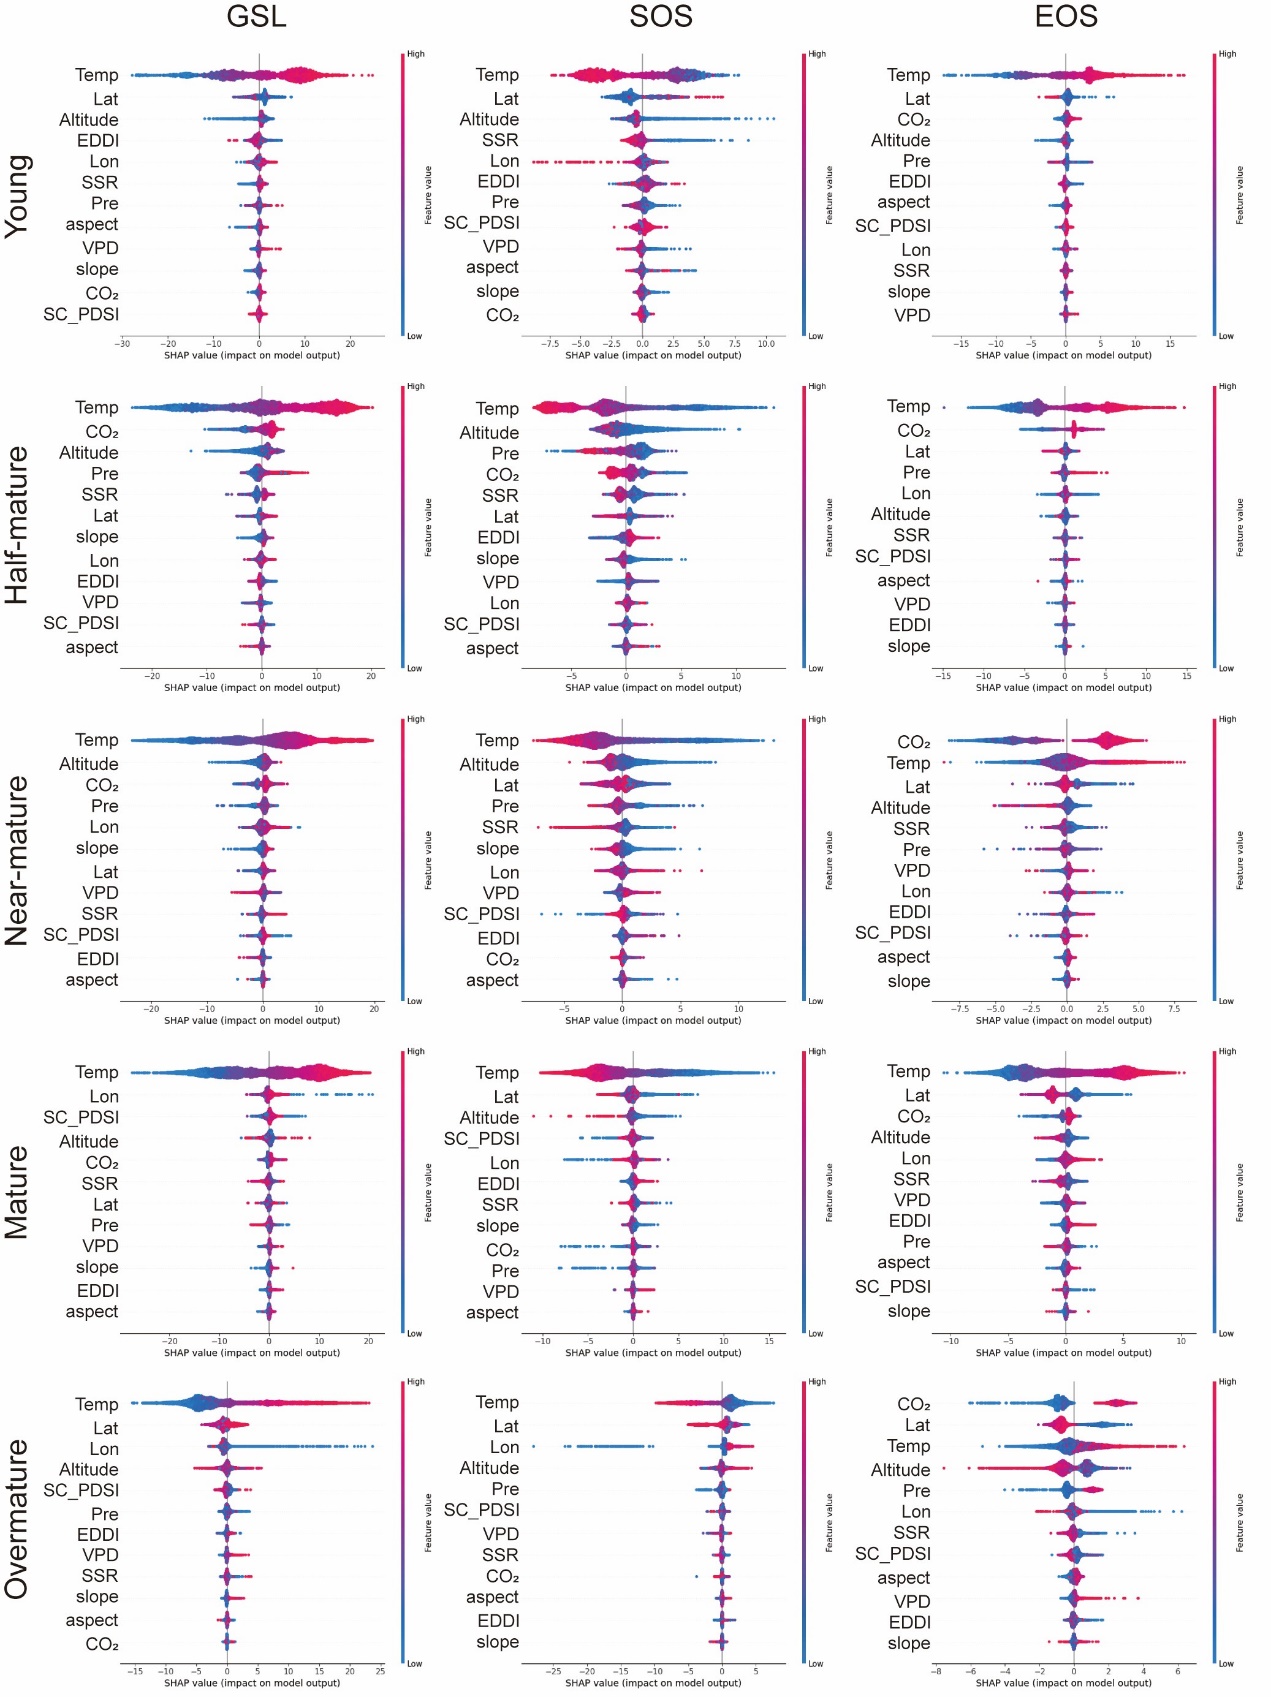


**Supplementary Fig 4. SHAP Feature Importance Ranking Plot in WTZ**


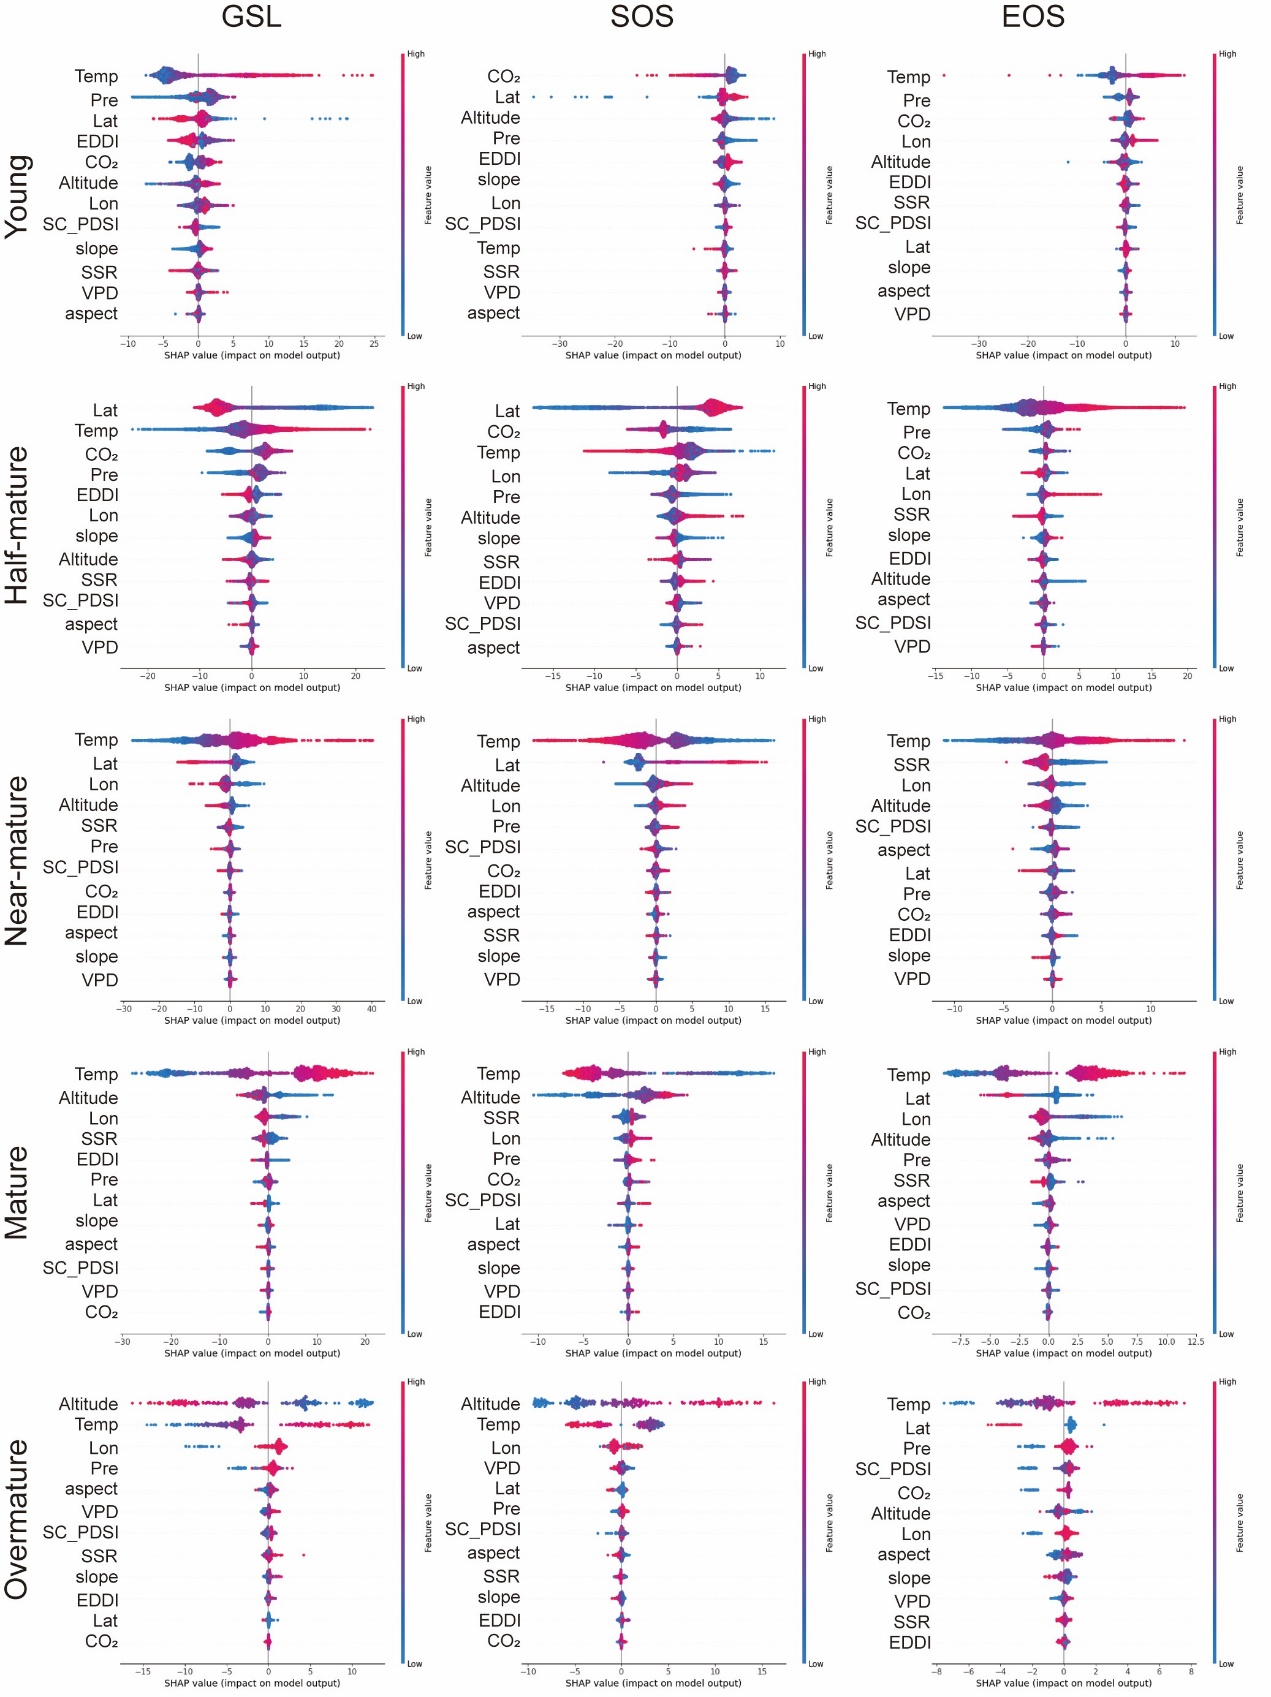


**Supplementary Fig 5. SHAP Feature Importance Ranking Plot in STZ**


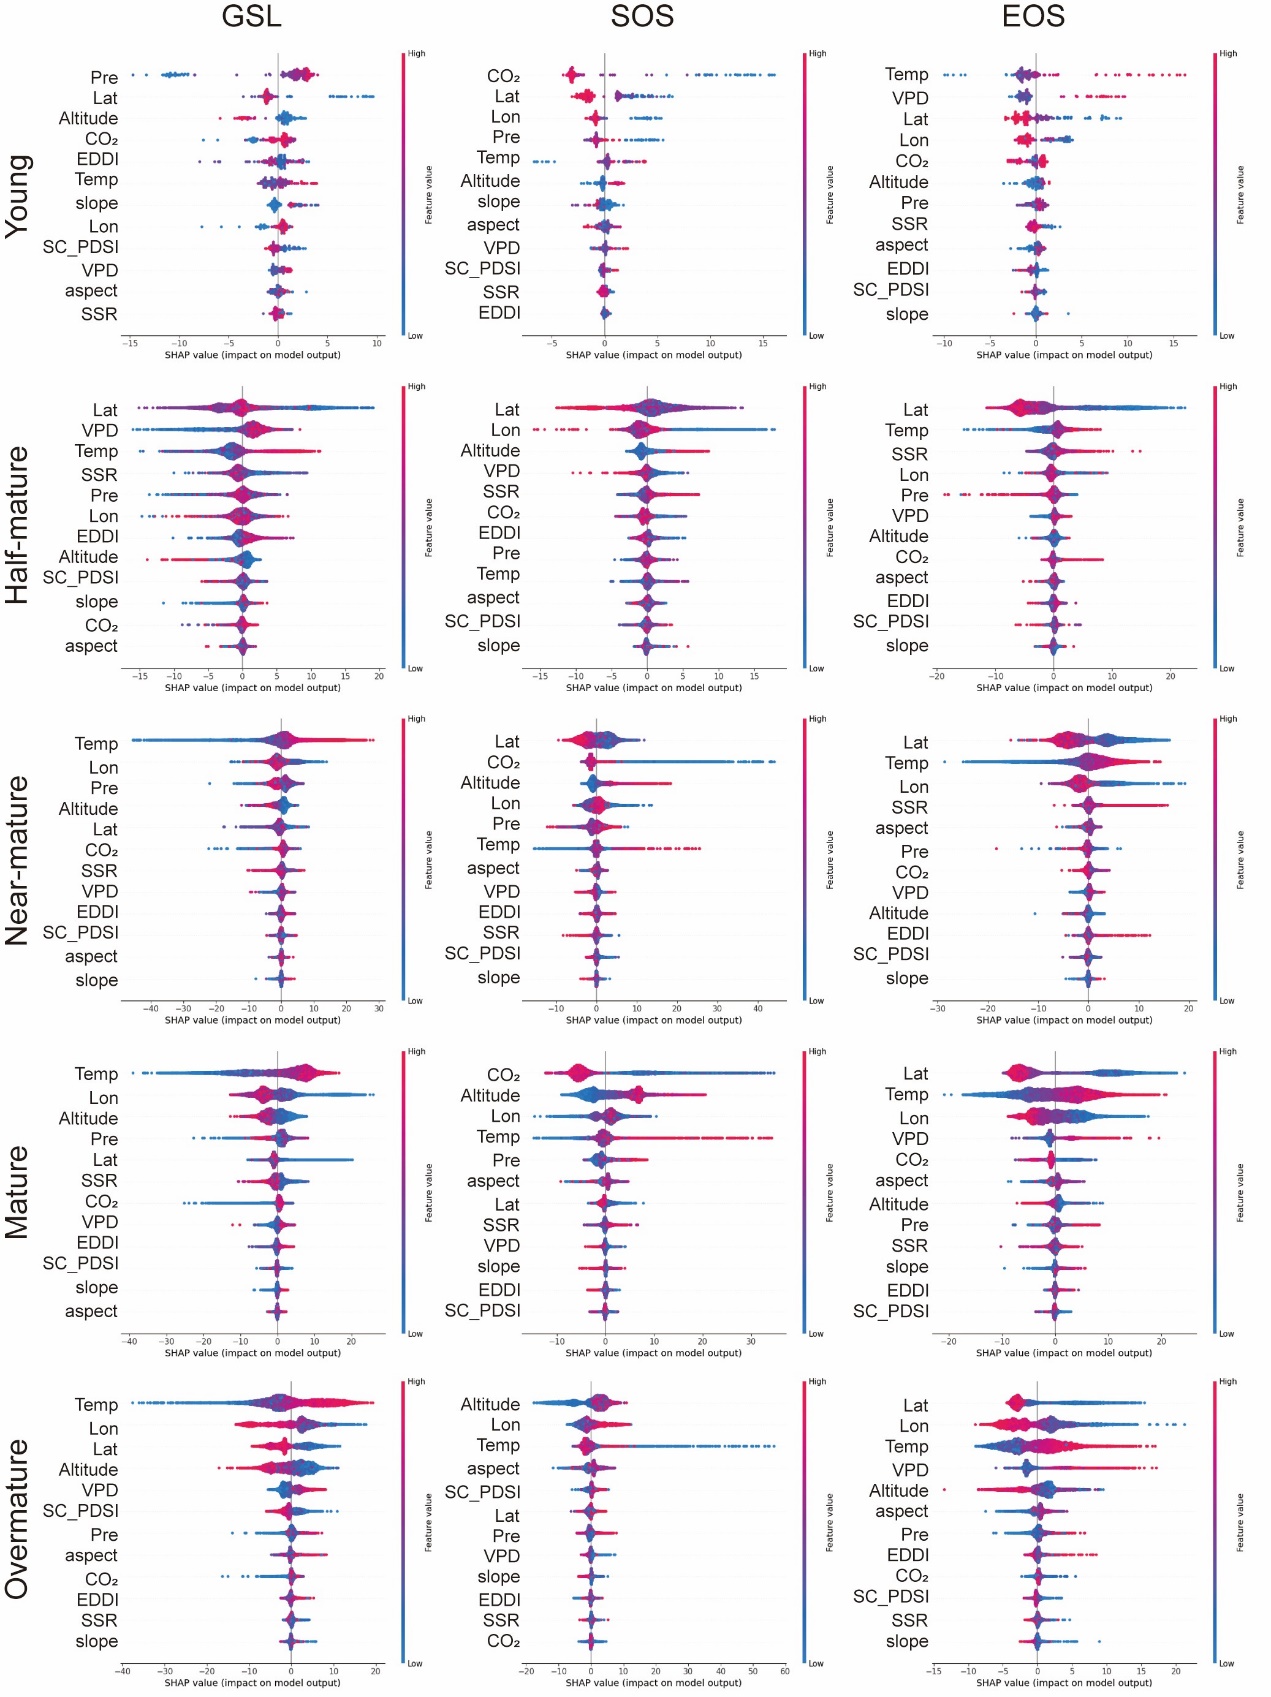


**Supplementary Fig 6. SHAP Feature Importance Ranking Plot in TZ**


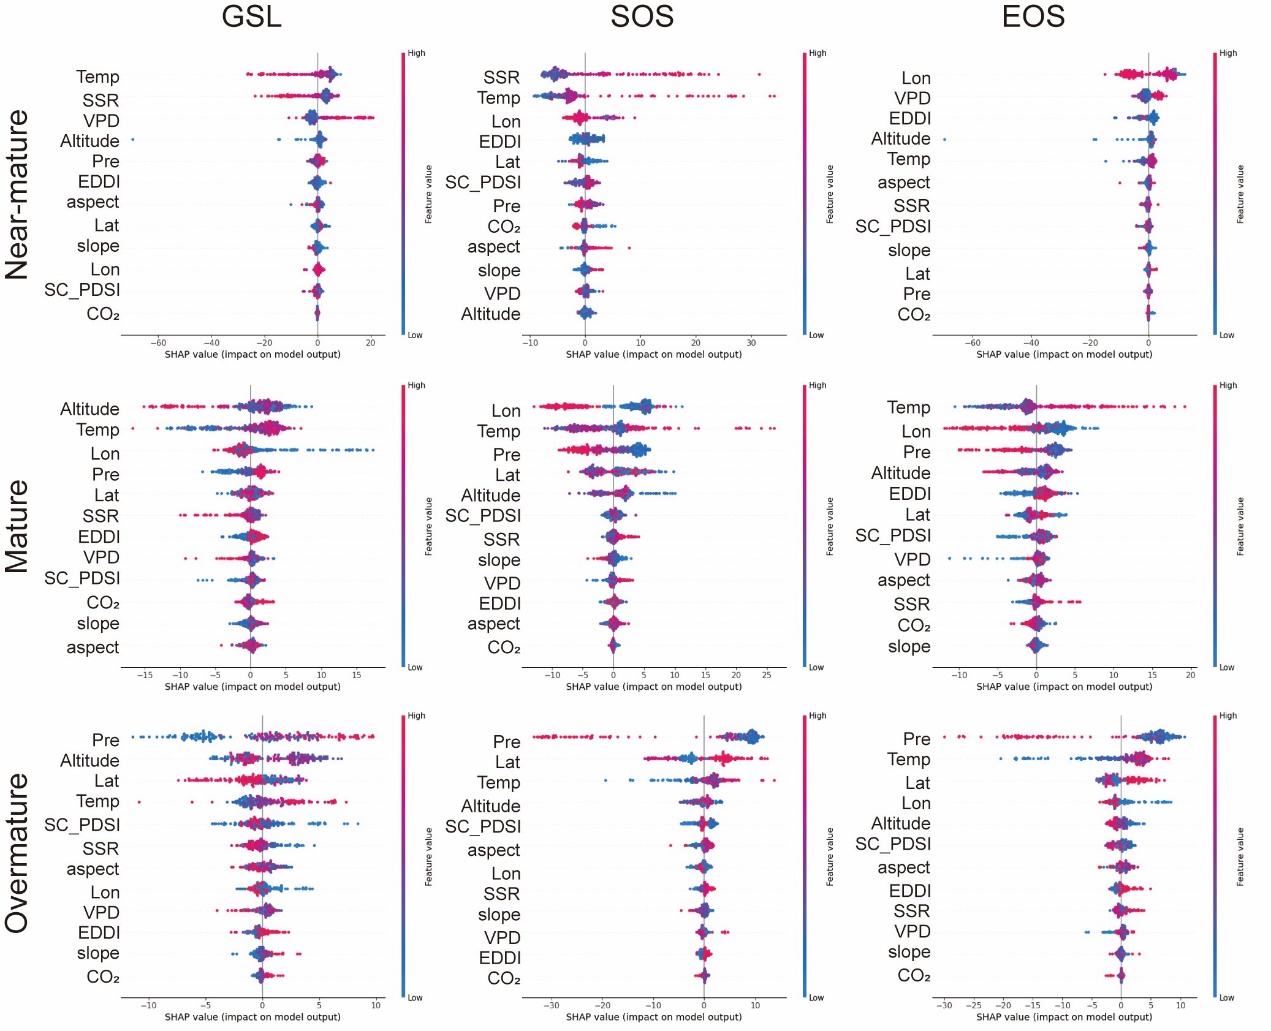


**Supplementary Table 1 Description and origin of the variables used in this study.**

| Type | Variables | Units | Description | Database | Reference |
| --- | --- | --- | --- | --- | --- |
| Vegetation Variables | Forest age | year | A framework for estimating China’s forest age by combining remote sensing time series analysis and machine learning algorithms based on over 50 000 field measurements and a remote sensing dataset. | 2020 forest age map for China with 30 m resolution | 1 |
| Vegetation Variables | NPP | kgC/m²/year | Net Primary Productivity | MOD17A3HGF Version 6.1 | 2 |
| Climate Variables | Tempreture (Tem) | K | a dataset based on enhanced Reanalysis and Thermal infrared remote sensing Merging (E-RTM) method. | Daily 1-km all-weather land surface temperature dataset for the China's landmass and its surrounding areas (TRIMS LST; 2000-2022) | 3 |
| Climate Variables | CO2 | % | the Gridded Monthly OCO-2 Carbon Dioxide assimilated dataset | OCO2_GEOS_L3CO2_MONTH | 4 |
| Climate Variables | Precipitation (Pre) | mm | This dataset is generated in China through the Delta spatial downscaling scheme based on the global 0.5 ° climate dataset released by CRU and the global high-resolution climate dataset released by WorldClim. | 1-km monthly precipitation dataset for China (1901-2023) | 5 |
| Climate Variables | Surface Solar Radiation (SSR) | W m-2 | the surface net radiation (SSR) from the ERA5 data set | China's net solar radiation data set based on era5 from 1982 to 2020 | 6 |
| Climate Variables | EDDI |  | an innovative and comprehensive long-term meteorological drought dataset with a spatial resolution of 0.1° and data collected from 1961 to 2022 in mainland China. | A New High-Resolution Multi-Drought Indices Dataset for Mainland China; CHM_Drought | 7 |
| Climate Variables | VPD |  | an innovative and comprehensive long-term meteorological drought dataset with a spatial resolution of 0.1° and data collected from 1961 to 2022 in mainland China. | A New High-Resolution Multi-Drought Indices Dataset for Mainland China; CHM_Drought | 7 |
| Climate Variables | SC_PDSI |  | an innovative and comprehensive long-term meteorological drought dataset with a spatial resolution of 0.1° and data collected from 1961 to 2022 in mainland China. | A New High-Resolution Multi-Drought Indices Dataset for Mainland China; CHM_Drought | 7 |
| Geography Variables | Altitude | m | the latest global bathymetric product released by the General Bathymetric Chart of the Oceans (GEBCO) and the land data in the GEBCO Grid are taken directly from SRTM15+ for all areas outside the Polar regions. | GEBCO_2020 Grid | 8 |
| Geography Variables | Aspect | ° | calculated from Altitude |  |  |
| Geography Variables | Slope | ° | calculated from Altitude |  |  |
| Soil Variables | Aboveground Biomass Carbon (AGBC) | t ha-1 | Based on the forest litter carbon density data observed at a large number of stations, the dataset was simulated and evaluated by using a random forest model driven by long-term remote sensing observation NDVI data to simulate and evaluate the temporal and spatial variation characteristics of forest litter carbon density in China from 1982 to 2020. | Forest litter carbon density dataset in China from 1982 to 2020 | 9 |
| Soil Variables | Belowground Biomass Carbon (BGBC) | t ha-1 | Based on the forest litter carbon density data observed at a large number of stations, the dataset was simulated and evaluated by using a random forest model driven by long-term remote sensing observation NDVI data to simulate and evaluate the temporal and spatial variation characteristics of forest litter carbon density in China from 1982 to 2020. | Forest litter carbon density dataset in China from 1982 to 2021 | 9 |
| Soil Variables | SOCc | g kg-1 | global digital soil mapping that makes use of global soil profile information and covariate data to model the spatial distribution of soil properties across the globe. | ISRIC—World Soil Information (2023). SoilGrids . | 10 |
| Soil Variables | Surface soil moisture (SSM) | m3 m-3 | an accurate microwave remote sensing-based SSM data | Spatially seamless, daily SMAP (SSD_SMAP) surface soil moisture dataset from 2015 to 2021 | 11 |
| Phenology data | Start of season (SOS)/Greenup | day | Date when EVI2 first crossed 15% of the segment EVI2 amplitude | MCD12Q2 Version 6.1 | 12 |
| Phenology data | End of season (EOS)/Dormancy | day | Date when EVI2 last crossed 15% of the segment EVI2 amplitude | MCD12Q2 Version 6.1 | 12 |

**Supplementary Table 2 Random Forest Accuracy of Forest Stages Classification Across Thermal Zones**

|  | Phenological indicators | Cold temperature zone(CTZ) | | | Plateau climate zone(PZ) | | | Mid-temperature zone(MTZ) | | | Warm temperature zone(WTZ) | | | Sub-tropical zone(STZ) | | | Tropical zone(TZ) | | |
| --- | --- | --- | --- | --- | --- | --- | --- | --- | --- | --- | --- | --- | --- | --- | --- | --- | --- | --- | --- |
| R2 | MAE | RMSE | R2 | MAE | RMSE | R2 | MAE | RMSE | R2 | MAE | RMSE | R2 | MAE | RMSE | R2 | MAE | RMSE |
| Forest Stage: 1 young forest | GSL | - | - | - | - | - | - | 0.77 | 4.09 | 5.85 | 0.82 | 3.44 | 5.07 | 0.53 | 7.55 | 12.44 | - | - | - |
| SOS | - | - | - | - | - | - | 0.65 | 2.94 | 4.28 | 0.73 | 2.23 | 3.20 | 0.68 | 5.49 | 9.85 | - | - | - |
| EOS | - | - | - | - | - | - | 0.82 | 1.87 | 2.64 | 0.83 | 2.02 | 2.93 | 0.75 | 4.83 | 7.46 | - | - | - |
| Forest Stage: 2  half-mature forest | GSL | - | - | - | 0.91 | 7.07 | 9.23 | 0.87 | 3.52 | 5.26 | 0.93 | 3.12 | 4.42 | 0.58 | 6.69 | 9.32 | - | - | - |
| SOS | - | - | - | 0.69 | 6.87 | 10.69 | 0.76 | 2.89 | 4.44 | 0.94 | 2.04 | 2.91 | 0.57 | 4.77 | 6.82 | - | - | - |
| EOS | - | - | - | 0.86 | 3.90 | 5.90 | 0.88 | 1.50 | 2.37 | 0.86 | 1.89 | 2.66 | 0.73 | 4.43 | 6.05 | - | - | - |
| Forest Stage: 3 near-mature forest | GSL | 0.74 | 2.31 | 2.99 | 0.75 | 6.85 | 9.76 | 0.85 | 3.00 | 4.28 | 0.92 | 2.98 | 3.88 | 0.69 | 5.89 | 8.19 | 0.54 | 10.84 | 13.99 |
| SOS | 0.75 | 1.94 | 2.48 | 0.58 | 6.15 | 8.78 | 0.71 | 2.45 | 3.64 | 0.93 | 1.85 | 2.40 | 0.73 | 4.40 | 6.23 | 0.69 | 10.54 | 13.44 |
| EOS | 0.60 | 1.16 | 1.46 | 0.75 | 3.19 | 4.28 | 0.89 | 1.34 | 1.87 | 0.84 | 1.71 | 2.25 | 0.75 | 4.46 | 6.27 | 0.25 | 9.07 | 15.16 |
| Forest Stage: 4 mature forest | GSL | 0.68 | 2.69 | 3.64 | 0.62 | 8.68 | 11.71 | 0.92 | 2.31 | 3.13 | 0.92 | 2.79 | 3.76 | 0.76 | 5.95 | 8.52 | 0.49 | 10.17 | 13.26 |
| SOS | 0.67 | 1.97 | 2.77 | 0.52 | 8.10 | 11.41 | 0.86 | 1.58 | 2.27 | 0.92 | 1.79 | 2.41 | 0.80 | 4.65 | 7.03 | 0.53 | 8.01 | 11.00 |
| EOS | 0.67 | 1.26 | 1.65 | 0.57 | 3.89 | 5.15 | 0.91 | 1.35 | 1.82 | 0.87 | 1.67 | 2.26 | 0.86 | 4.62 | 6.63 | 0.53 | 8.39 | 11.02 |
| Forest Stage: 5 overmature forest | GSL | 0.57 | 3.35 | 4.78 | 0.61 | 7.61 | 10.06 | 0.84 | 2.45 | 3.62 | 0.72 | 4.74 | 8.65 | 0.77 | 6.00 | 8.63 | 0.50 | 10.82 | 13.64 |
| SOS | 0.60 | 2.43 | 3.49 | 0.54 | 7.83 | 10.13 | 0.86 | 1.46 | 2.03 | 0.69 | 3.31 | 5.64 | 0.57 | 5.62 | 8.86 | 0.66 | 9.46 | 13.55 |
| EOS | 0.40 | 1.51 | 2.27 | 0.54 | 3.41 | 4.44 | 0.83 | 1.43 | 2.18 | 0.59 | 2.96 | 5.14 | 0.78 | 4.21 | 6.25 | 0.53 | 10.49 | 12.91 |

**References**

1. Cheng, K. et al. 2020 forest age map for China with 30 m resolution. Zenodo https://doi.org/10.5281/ZENODO.8354262 (2023).
2. Running, S. & Zhao, M. MODIS/Terra Net Primary Production Gap-Filled Yearly L4 Global 500 m SIN Grid V061. NASA Land Processes Distributed Active Archive Center https://doi.org/10.5067/MODIS/MOD17A3HGF.061 (2021).
3. Tang, W. et al. TRIMS LST: a daily 1 km all-weather land surface temperature dataset for China’s landmass and surrounding areas (2000–2022). Earth Syst. Sci. Data **16**, 387–419 (2024).
4. NASA/GSFC/GMAO Carbon Group. OCO-2 GEOS Level 3 monthly, 0.5x0.625 assimilated CO2 V10r (OCO2_GEOS_L3CO2_MONTH) at GES DISC. NASA Goddard Earth Sciences Data and Information Services Center https://doi.org/10.5067/BGFIODET3HZ8 (2021).
5. Shouzhang Peng. High-spatial-resolution monthly precipitation dataset over China during 1901–2017. Zenodo https://doi.org/10.5281/ZENODO.3114194 (2019).
6. Wu, J. et al. Constructing High-Resolution (10 km) Daily Diffuse Solar Radiation Dataset across China during 1982–2020 through Ensemble Model. Remote Sensing **14**, 3695 (2022).
7. Zhang, Q. & Miao, C. A New High-Resolution Multi-Drought Indices Dataset for Mainland China; CHM_Drought. 8229834359 Bytes figshare https://doi.org/10.6084/M9.FIGSHARE.25656951.V2 (2024).
8. GEBCO Bathymetric Compilation Group 2019. The GEBCO_2019 Grid - a continuous terrain model of the global oceans and land. British Oceanographic Data Centre, National Oceanography Centre, NERC, UK https://doi.org/10.5285/836F016A-33BE-6DDC-E053-6C86ABC0788E (2019).
9. Wang, Zhaosheng. NDVI-driven model of random forest to simulate forest litter carbon density over China during 1982~2020.Remote Sensing Technology and Application，**38**（6）：1381-1389.(2023)
10. Hengl, T. et al. SoilGrids250m: Global gridded soil information based on machine learning. PLoS ONE 12, e0169748 (2017).
11. Yang, H. Spatially Seamless, Daily SMAP (SSD_SMAP) Surface Soil Moisture Dataset from 2015 to 2021. 2905526145 Bytes (figshare, 2022). doi:10.6084/M9.FIGSHARE.20279514.V3.
12. Friedl, M., Gray, J. & Sulla-Menashe, D. MODIS/Terra+Aqua Land Cover Dynamics Yearly L3 Global 500m SIN Grid V061. NASA Land Processes Distributed Active Archive Center https://doi.org/10.5067/MODIS/MCD12Q2.061 (2022).
